# Supplementary material for: Toward the precision breast cancer survival prediction utilizing combined whole genome-wide expression and somatic mutation analysis
Source: PubMed Central journal article supplement (PMC6245494; doi:10.1186/s12920-018-0419-x), 2018-11-20

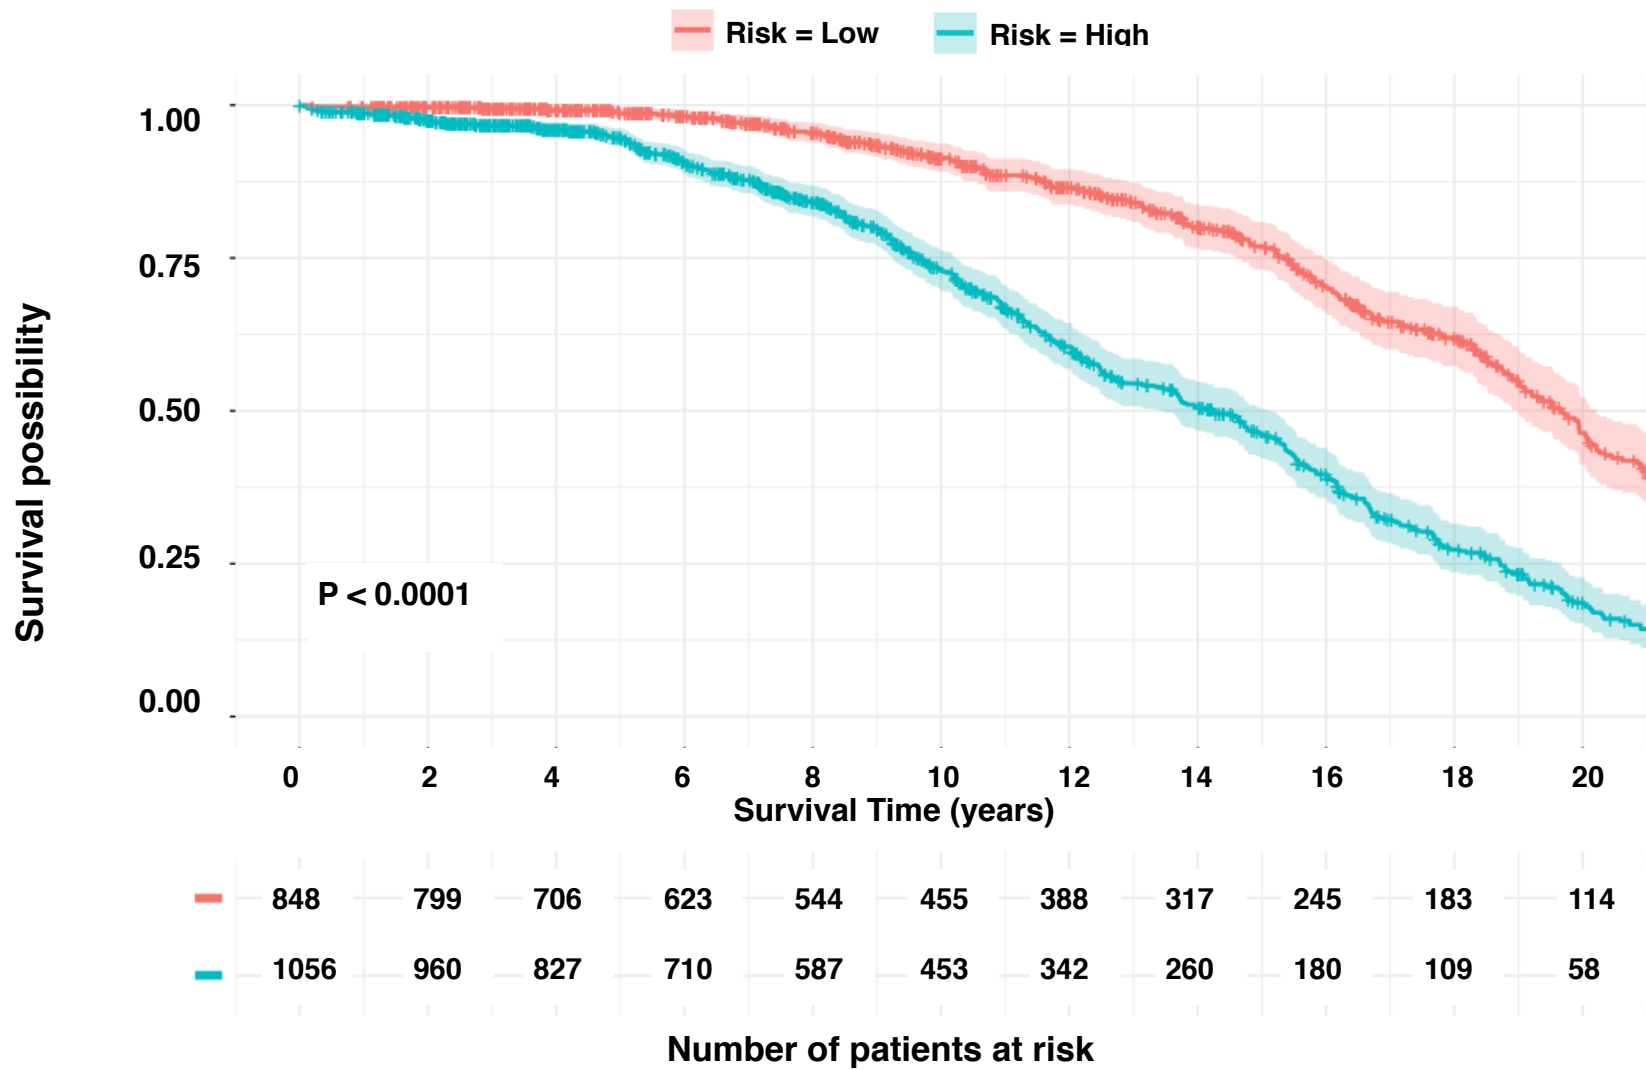

Supplement: 12920_2018_419_MOESM2_ESM.pdf [file 12920_2018_419_MOESM2_ESM.pdf]
